# Supplementary material for: Tumor cells have decreased ability to metabolize H2O2: Implications for pharmacological ascorbate in cancer therapy
Source: PubMed Central journal article supplement — Redox Biol. 2016 Oct 28;10:274–84. doi: 10.1016/j.redox.2016.10.010 (PMC5106370; doi:10.1016/j.redox.2016.10.010), 2016-10-28
Supplement: mmc1.pdf [file mmc1.pdf]

**Supplementary Materials for:****Tumor cells have decreased ability to metabolize H<sub>2</sub>O<sub>2</sub>:  
Implications for pharmacological ascorbate in cancer therapy***Redox Biology* (2016)<http://dx.doi.org/10.1016/j.redox.2016.10.010>

by

Claire M. Doskey<sup>1</sup>, Visarut Buranasudja<sup>1</sup>, Brett A. Wagner<sup>2</sup>, Justin G. Wilkes<sup>3</sup>,  
Juan Du<sup>3</sup>, Joseph J. Cullen<sup>2,3,4</sup>, Garry R. Buettner<sup>1,2,\*</sup>

<sup>1</sup> Interdisciplinary Graduate Program in Human Toxicology

<sup>2</sup> Free Radical & Radiation Biology Program in the Department of Radiation Oncology

<sup>3</sup> Department of Surgery

<sup>4</sup> Veterans Affairs Medical Center

The University of Iowa, Iowa City, IA 52242

\*Corresponding Author:

Garry R. Buettner, PhD  
Free Radical & Radiation Biology  
Department of Radiation Oncology  
Med Labs B180  
The University of Iowa  
Iowa City, IA 52242  
[garry-buettner@uiowa.edu](mailto:garry-buettner@uiowa.edu)  
Tel: +1 319-335-8015

## Supplementary Figures

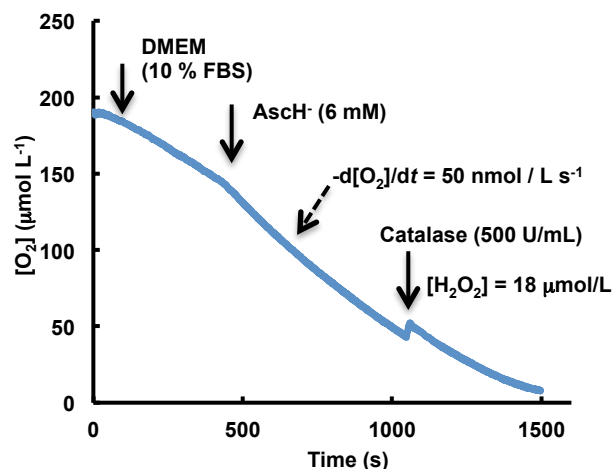

**Fig. S1. Ascorbate is oxidized in DMEM generating a flux of H<sub>2</sub>O<sub>2</sub>.** The increase in the rate of oxygen consumption upon the introduction ascorbate (6.0 mM) in DMEM with 10 % FBS is about 50 nmol L<sup>-1</sup> s<sup>-1</sup>. Addition of catalase leads to a return of oxygen, which indicates that 18 µmol L<sup>-1</sup> of H<sub>2</sub>O<sub>2</sub> accumulated in the medium. This is consistent with previous observations on the oxidation of ascorbate in cell culture medium [1, 2]. If cells were present at the typical cell densities used in this work, the level of H<sub>2</sub>O<sub>2</sub> that would accumulate would be below the limit of detection of a Clark electrode; the removal of this H<sub>2</sub>O<sub>2</sub> by cells is a central theme of this work. If this extracellular H<sub>2</sub>O<sub>2</sub> did not react further, then the amount of H<sub>2</sub>O<sub>2</sub> that would accumulate in the medium would be 50% of the oxygen consumed. Here the concentration of oxygen in the medium decreases by about 150 µM at the time of addition of catalase; if all of this O<sub>2</sub> were to accumulate as H<sub>2</sub>O<sub>2</sub>, then the addition of catalase would have yielded an increase in the concentration of O<sub>2</sub> of ≈75 µM. We observed an increase of about 18 µM. This indicates that some of the H<sub>2</sub>O<sub>2</sub> formed is slowly being removed, likely being reduced to H<sub>2</sub>O. It is not fully appreciated by many that the serum used in cell culture medium contains heme peroxidase activity [3]. These sera peroxidases will be activated by H<sub>2</sub>O<sub>2</sub> leading to the removal of H<sub>2</sub>O<sub>2</sub> and the oxidation of substances in the medium by these activated peroxidases [3]. A Clark electrode was employed for this experiment, not only to determine the rate of oxygen consumption, but also to demonstrate the formation of H<sub>2</sub>O<sub>2</sub>. Because high levels of ascorbate are present in the medium, typical fluorescent probes coupled with horseradish peroxidase to determine the levels of H<sub>2</sub>O<sub>2</sub> in medium cannot be employed because of interfering chemistry.

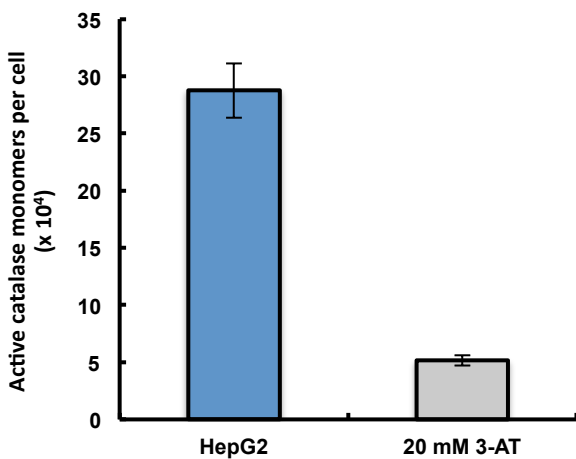

**Fig. S2. 3-Amino-1,2,4-triazole inhibits catalase in HepG2 cells.** Catalase activity decreased to  $\approx 20\%$  of control upon treatment with 20 mM 3-AT ( $n = 3$ , error bars are standard error of the mean).

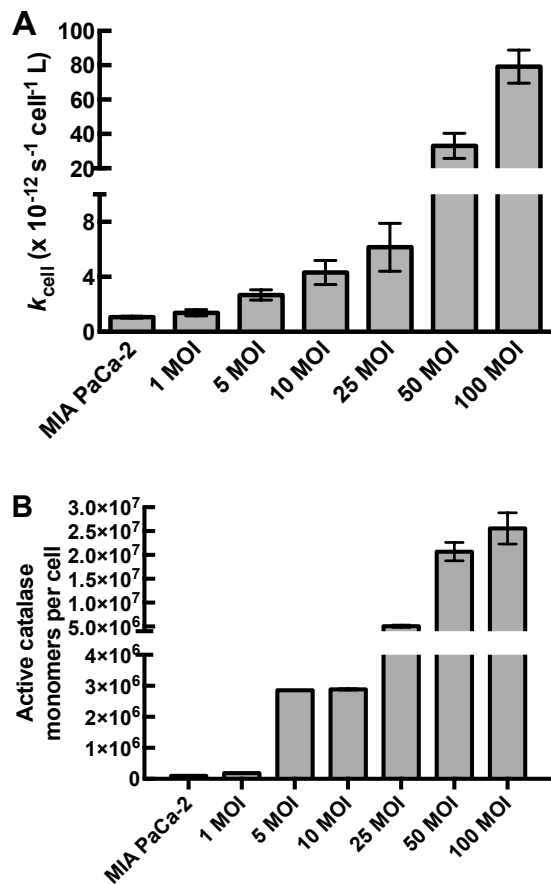

**Fig. S3. Transduction of MIA PaCa-2 cells with adenovirus catalase (0-100 MOI) increases capacity of cells to remove H<sub>2</sub>O<sub>2</sub> ( $k_{\text{cell}}$ ).**

**(A)** Transduction of MIA PaCa-2 cells with adenovirus catalase (1-100 MOI) resulted in 1.5- to 80-fold increase in the rate constant by which these cells remove H<sub>2</sub>O<sub>2</sub> ( $n = 4$ , error bars are standard error of the mean).

**(B)** Catalase activity after transduction with 1-100 MOI adenovirus catalase increased 1.5- to 2,500-fold from basal catalase activity of MIA PaCa-2 cells.

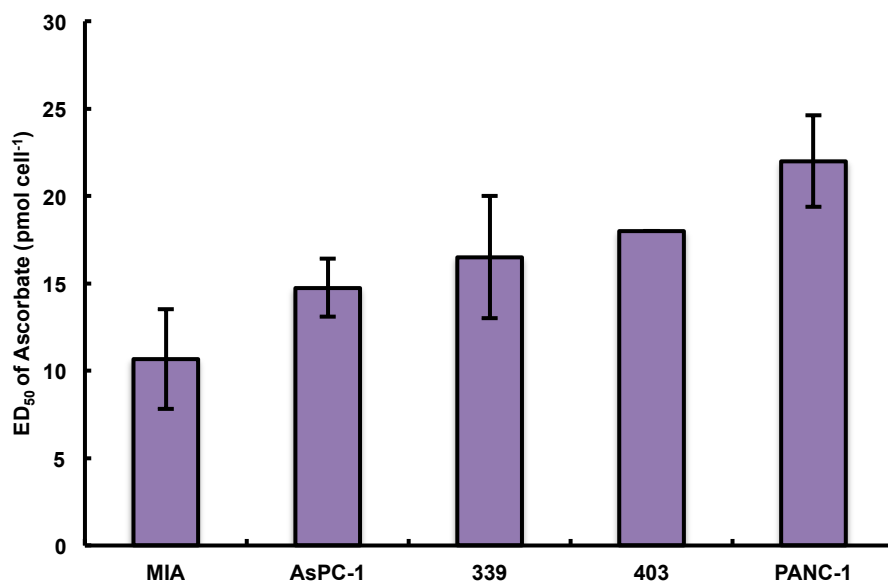

**Fig. S4. Sensitivity to ascorbate varies across pancreatic cancer cell lines.** The ED<sub>50</sub> of ascorbate was determined in MIA PaCa-2, AsPC-1, 403, 339, and PANC-1 cell lines using a clonogenic survival assay. The dose of ascorbate needed to decrease clonogenic survival by 50 % varied across pancreatic cancer cell lines. Some uncertainties are very small.

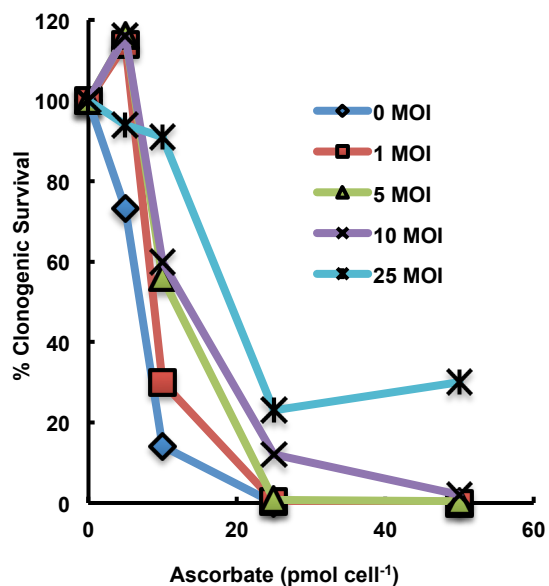

**Fig. S5. Transduction of MIA PaCa-2 cells with adenovirus catalase (0-25 MOI) increases resistance to ascorbate.** MIA PaCa-2 cells were transduced with adenovirus catalase at 0-25 MOI and then exposed to ascorbate (0-50 pmol cell<sup>-1</sup>). The dose-response curves shifted to the right with increasing transduction-MOI of adenovirus catalase.

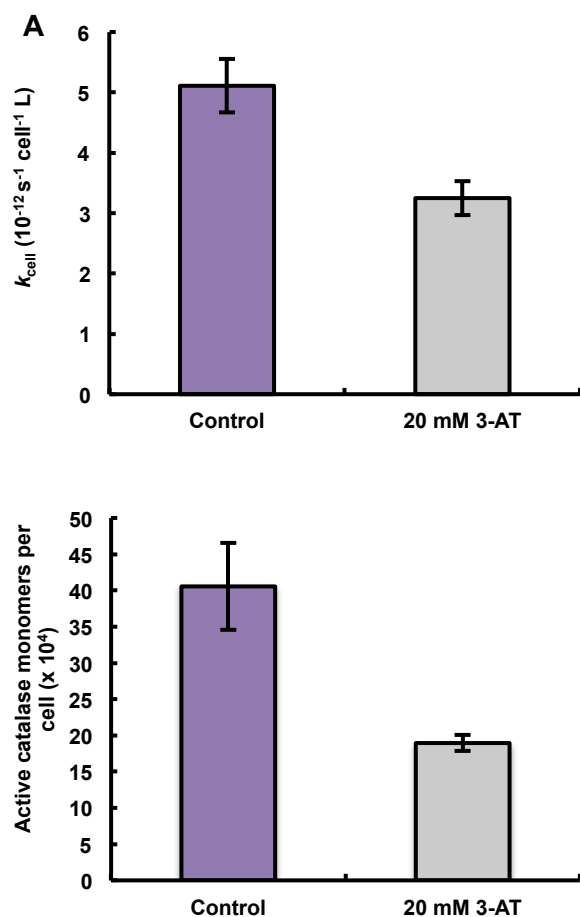

**Fig. S6. 3-Amino-1,2,4-triazole inhibits catalase and decreases the rate constant for removal of H<sub>2</sub>O<sub>2</sub> in PANC-1 cells.**

- (A)** The rate constant at which PANC-1 cells remove H<sub>2</sub>O<sub>2</sub> after treatment with 3-AT decreased 1.5-fold compared to untreated PANC-1 cells ( $n = 4$ , error bars are standard error of the mean).
- (B)** The effective number of active catalase molecules per cell following treatment with 3-AT decreased 2-fold compared to untreated PANC-1 cells ( $n = 3$ , error bars are standard error of the mean).

## Supplementary Discussion

The potential benefits of high-dose vitamin C (*i.e.*, ascorbic acid, referred to as pharmacological ascorbate, P-AsCH<sup>-</sup>), given by IV delivery as an adjuvant in the treatment of cancer, has gained considerable interest upon the uncovering of a new mechanism for its anticancer effects [4, 5, 6]. Intravenous ascorbate, but not oral ascorbate, produces high plasma concentrations, which are in the range that are cytotoxic to tumor cells. Clinical data show that when ascorbate is given orally, fasting plasma concentrations are tightly controlled at < 100 μM [7]. In contrast, when ascorbate is administered intravenously, plasma concentrations as high as 20 - 30 mM are safely achieved with few side effects [8]. Thus, it is clear that intravenous administration of ascorbate can yield very high plasma levels, while oral delivery does not.

These high levels of ascorbate act as a pro-drug for the delivery of hydrogen peroxide to tumors [4, 5, 6]. This H<sub>2</sub>O<sub>2</sub> appears to be significant in the anticancer mechanism. The present work uses absolute quantitative approaches to establish the central role for H<sub>2</sub>O<sub>2</sub> derived from the oxidation of ascorbate.

There are three distinct arenas for the current research on the use of P-AsCH<sup>-</sup> to treat cancer, **Fig. S7**. The research represented by **Node 1** is focused on how to achieve the highest possible flux of H<sub>2</sub>O<sub>2</sub> in tumors. The research represented by **Node 2** is addressing how cells protect themselves from this high flux of H<sub>2</sub>O<sub>2</sub>, *i.e.* what enzyme systems and redox active molecules contribute to maintaining a low ambient level of intracellular H<sub>2</sub>O<sub>2</sub>. **Node 3** represents the effects of P-AsCH<sup>-</sup> on small molecules, proteins, as well as pathways and networks and the subsequent response to the intracellular H<sub>2</sub>O<sub>2</sub> resulting from **1** and **2**.

Data from cell culture experiments indicate that P-AsCH<sup>-</sup> induces selective oxidative stress and cytotoxicity in cancer cells vs. normal cells by a mechanism involving the production of H<sub>2</sub>O<sub>2</sub> [4, 5, 6, 9, 10]. In these studies the addition of various forms of both extracellular and intracellular catalase, which remove H<sub>2</sub>O<sub>2</sub>, reverse the toxicity induced by pharmacological P-AsCH<sup>-</sup> in a variety of cancer cell lines, while normal cells are resistant. Thus, in cell culture the

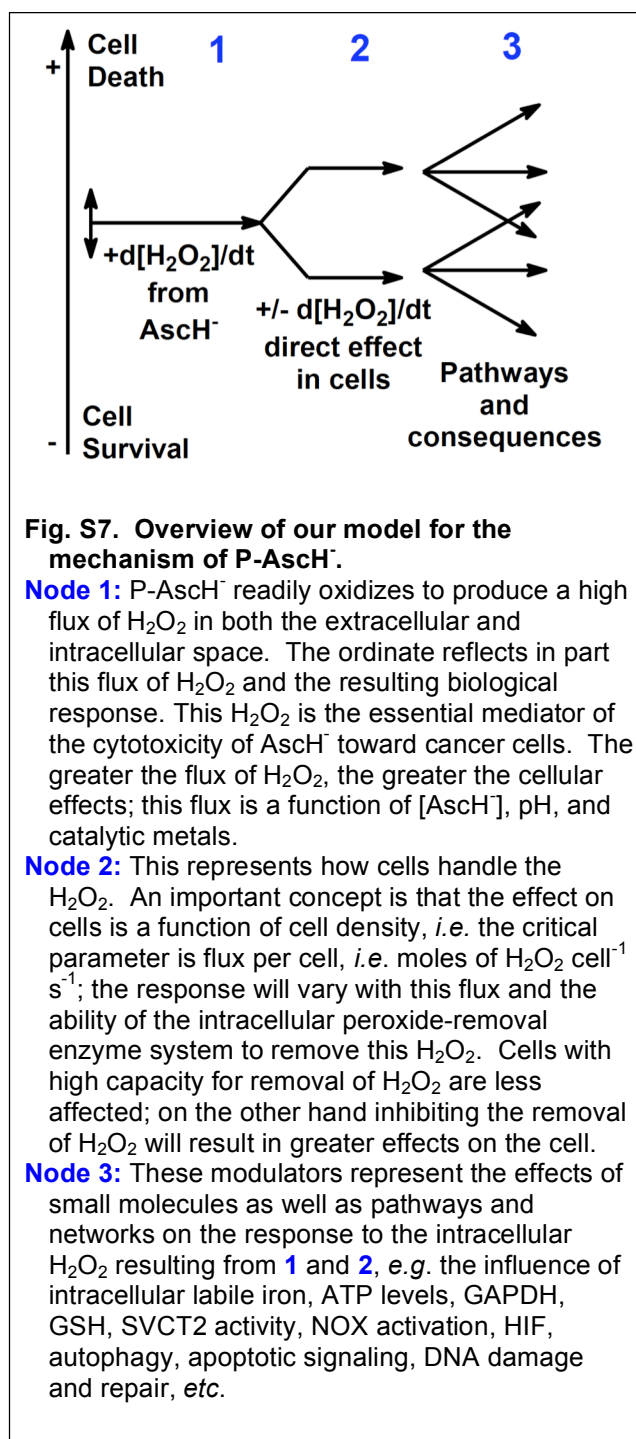

**Fig. S7. Overview of our model for the mechanism of P-AsCH<sup>-</sup>.**

**Node 1:** P-AsCH<sup>-</sup> readily oxidizes to produce a high flux of H<sub>2</sub>O<sub>2</sub> in both the extracellular and intracellular space. The ordinate reflects in part this flux of H<sub>2</sub>O<sub>2</sub> and the resulting biological response. This H<sub>2</sub>O<sub>2</sub> is the essential mediator of the cytotoxicity of AsCH<sup>-</sup> toward cancer cells. The greater the flux of H<sub>2</sub>O<sub>2</sub>, the greater the cellular effects; this flux is a function of [AsCH<sup>-</sup>], pH, and catalytic metals.

**Node 2:** This represents how cells handle the H<sub>2</sub>O<sub>2</sub>. An important concept is that the effect on cells is a function of cell density, *i.e.* the critical parameter is flux per cell, *i.e.* moles of H<sub>2</sub>O<sub>2</sub> cell<sup>-1</sup> s<sup>-1</sup>; the response will vary with this flux and the ability of the intracellular peroxide-removal enzyme system to remove this H<sub>2</sub>O<sub>2</sub>. Cells with high capacity for removal of H<sub>2</sub>O<sub>2</sub> are less affected; on the other hand inhibiting the removal of H<sub>2</sub>O<sub>2</sub> will result in greater effects on the cell.

**Node 3:** These modulators represent the effects of small molecules as well as pathways and networks on the response to the intracellular H<sub>2</sub>O<sub>2</sub> resulting from **1** and **2**, *e.g.* the influence of intracellular labile iron, ATP levels, GAPDH, GSH, SVCT2 activity, NOX activation, HIF, autophagy, apoptotic signaling, DNA damage and repair, *etc.*



chemistry of small molecules in the medium that react with H<sub>2</sub>O<sub>2</sub> and thereby remove it must also be considered.

For example thiol compounds, such as cysteine, N-acetylcysteine (NAC) and glutathione (GSH), as well as pyruvate, and even certain iron compounds, will react directly with H<sub>2</sub>O<sub>2</sub>, thereby removing it. This chemistry is in addition to changes in the redox biochemistry that these substances may bring about in cells.

### Iron as catalyst and protectant

Catalytic metals, such as iron and copper can serve as catalysts for the oxidation of ascorbate [11]. These same metals can also react with H<sub>2</sub>O<sub>2</sub>. Thus, in cell culture experiments, higher levels of extracellular iron can actually protect cells from the detrimental effects of extracellular H<sub>2</sub>O<sub>2</sub> [12, 13]. However, it must be kept in mind that not all iron or copper species will catalyze the oxidation of ascorbate; the coordination environment and resulting thermodynamics and kinetics are central to the catalytic efficiency [14].

### Kinetic considerations

The second-order rate constant for the reaction of cysteine with H<sub>2</sub>O<sub>2</sub> is  $k_{\text{Cys}} = 1.1 \text{ M}^{-1} \text{ s}^{-1}$  (pH 7.4, 37 °C) [15]; from the apparent  $pK_a$  of the thiol proton, estimates for the second-order rate constant for GSH would be,  $k_{\text{GSH}} \approx 0.3 \text{ M}^{-1} \text{ s}^{-1}$  (pH 7.4, 37 °C) and for NAC,  $k_{\text{NAC}} \approx 0.05 \text{ M}^{-1} \text{ s}^{-1}$ . This value for  $k_{\text{NAC}}$  is somewhat smaller than  $0.85 \text{ M}^{-1} \text{ s}^{-1}$  (pH 7.4) estimated by Aruoma *et al.* [16]. Analysis of published data indicates that the rate constant for the reaction of pyruvate with H<sub>2</sub>O<sub>2</sub> is  $k_{\text{pyruvate}} = 2 \text{ M}^{-1} \text{ s}^{-1}$  (pH 7.4, 37 °C) [17, 18]; the rate constant for the parallel decarboxylation reaction with oxaloacetate would be similar. Thus, the direct chemistry of these and similar substances that will remove H<sub>2</sub>O<sub>2</sub> cannot be overlooked.

For example in a recent study on potential mechanisms of P-AsCH<sup>-</sup> some of these compounds were included in the cell culture medium at concentrations of 5 mM [19]. At this concentration, the pseudo first-order rate constant for the removal of H<sub>2</sub>O<sub>2</sub> by GSH/GS<sup>-</sup> would be:

$$\begin{aligned} k'_{\text{GSH/GS}^-} &= (5 \times 10^{-3} \text{ M}) \times (0.3 \text{ M}^{-1} \text{ s}^{-1}) \\ &= 1.5 \times 10^{-3} \text{ s}^{-1} \end{aligned}$$

The cell density was reported as  $\approx 3500 \text{ cells}/200 \mu\text{L} = 17 \times 10^6 \text{ cell L}^{-1}$ . If the cells have a robust capacity to remove H<sub>2</sub>O<sub>2</sub>, *e.g.*  $k_{\text{cell}} = 5 \times 10^{-12} \text{ s}^{-1} \text{ cell}^{-1} \text{ L}$ , then the pseudo first-order rate constant for the removal of H<sub>2</sub>O<sub>2</sub> by cells would be:

$$\begin{aligned} k'_{\text{cell}} &= (17 \times 10^6 \text{ cell L}^{-1}) (5 \times 10^{-12} \text{ s}^{-1} \text{ cell}^{-1} \text{ L}) \\ &= 0.09 \times 10^{-3} \text{ s}^{-1} \end{aligned}$$

Thus,  $\approx 95 \%$  of the H<sub>2</sub>O<sub>2</sub> formed upon the oxidation of ascorbate in the cell culture medium would be consumed by GSH/GS<sup>-</sup>, thereby protecting the cells. If in a similarly designed experiment the cell culture medium contained pyruvate at 5 mM, then

$$\begin{aligned} k'_{\text{pyruvate}} &= (5 \times 10^{-3} \text{ M}) \times (2 \text{ M}^{-1} \text{ s}^{-1}) \\ &= 10 \times 10^{-3} \text{ s}^{-1} \end{aligned}$$

or 99 % of the H<sub>2</sub>O<sub>2</sub> produced would be removed by pyruvate. Thus, a significant role for H<sub>2</sub>O<sub>2</sub> in the mechanism of toxicity of P-AsCH<sup>-</sup> in the experiments of Yun *et al.* [19] needs to be considered [20].

Clearly quantitative approaches provide a much richer context in which to analyze experimental results. Unfortunately, most laboratory assays provide relative changes or relative

levels of species or enzyme activities in some arbitrarily defined unit. This information is not directly useful in modeling, even the very simple kinetic model above, without a path to arrive at absolute levels. Absolute quantitation can provide context and crosschecks for data from different types of experiments and provide guidance as to what mechanistic possibilities are most probable and the most important.

Absolute quantitative data, such as provided in this work, can be compared directly to quantitative data generated by other laboratories around the world. Quantitative approaches lead to much improved reproducibility, greater efficiencies in the world's research enterprise, resulting in a more rapid rate of discovery that can be translated to improve human health [21, 22].

## Supplementary References

- <sup>1</sup> Du J, Martin S, Levine M, Wagner B, Buettner GR, Wang SH, Tagheyev AF, Du C, Knudson CM, Cullen JJ. (2010) Mechanisms of ascorbate-induced cytotoxicity in pancreatic cancer. *Clinical Cancer Research*. **16**:509-520. <http://dx.doi.org/10.1158/1078-0432.CCR-09-1713> PMID: PMC 20068072.
- <sup>2</sup> Rawal M, Schroeder SR, Wagner BA, Cushing CM, Welsh J, Button AM, Du J, Sibenaller ZA, Buettner GR, Cullen JJ. (2013) Manganoporphyrins increase ascorbate-induced cytotoxicity by enhancing H<sub>2</sub>O<sub>2</sub> generation. *Cancer Res*. **73(16)**:5232-5241. PMID: 23764544 <http://dx.doi.org/10.1158/0008-5472.CAN-13-0470> PMID: PMC3745518
- <sup>3</sup> Wagner BA, Teesch LM, Buettner GR, Britigan BE, Burns CP, Reszka KJ. (2007) Inactivation of anthracyclines by serum heme proteins. *Chem Res Tox*. **20**:920-926. PMID: 17497896 <http://dx.doi.org/10.1021/tx700002f> PMID: PMC3617216
- <sup>4</sup> Chen Q, Espey MG, Krishna MC, Mitchell JB, Corpe CP, Buettner GR, Shacter E, Levine M. (2005) Pharmacologic ascorbic acid concentrations selectively kill cancer cells: Action as a pro-drug to deliver hydrogen peroxide to tissues. *Proc Natl Acad Sci USA*. **102**:13604-13609. PMID: 16157892 <http://dx.doi.org/doi:10.1073/pnas.0506390102> PMID: PMC1224653.
- <sup>5</sup> Chen Q, Espey MG, Sun AY, Lee JH, Krishna MC, Shacter E, Choyke PL, Pooput C, Kirk KL, Buettner GR, Levin M. (2007) Ascorbic acid in pharmacologic concentrations: a pro-drug for selective delivery of ascorbate radical and hydrogen peroxide to extracellular fluid in vivo. *Proc Natl Acad Sci USA*. **104**:8749-8754. <http://dx.doi.org/10.1073/pnas.0702854104> PMID: PMC1885574.
- <sup>6</sup> Du J, Martin S, Levine M, Wagner B, Buettner GR, Wang SH, Tagheyev AF, Du C, Knudson CM, Cullen JJ. (2010) Mechanisms of ascorbate-induced cytotoxicity in pancreatic cancer. *Clinical Cancer Research*. **16**:509-520. <http://dx.doi.org/10.1158/1078-0432.CCR-09-1713> PMID: PMC 20068072.
- <sup>7</sup> Levine M, Conry-Cantilena C, Wang Y, Welch RW, Washko PW, Dhariwal KR, Park JB, Lazarev A, Graumlich JF, King J, Cantilena LR. (1996) Vitamin C pharmacokinetics in healthy volunteers: evidence for a recommended dietary allowance. *Proc Natl Acad Sci U S A*. **93(8)**:3704-3709. PMID: 8623000.
- <sup>8</sup> Welsh JL, Wagner BA, van't Erve TJ, Zehr PS, Berg DS, Halfdanarson TJ, Yee NS, Bodeker KL, Du J, Roberts LJ, Drisko J, Levine M, Buettner GR, Cullen JJ. (2013) Pharmacological ascorbate with gemcitabine for the control of metastatic and node-positive pancreatic cancer (PACMAN): Results from a phase I clinical trial. *Cancer Chemotherapy and Pharmacology*. **71**:765-775. <http://dx.doi.org/10.1007/s00280-013-2070-8> PMID: PMC3587047.

- <sup>9</sup> Rawal M, Schroeder SR, Wagner BA, Cushing CM, Welsh JL, Button AM, Du J, Sibenaller ZA, Buettner GR, Cullen JJ. (2013) Manganoporphyrins increase ascorbate-induced cytotoxicity by enhancing H<sub>2</sub>O<sub>2</sub> generation. *Cancer Res.* **73(16)**:5232-5241. PMC3745518.
- <sup>10</sup> Du J, Cieslak JA 3rd, Welsh JL, Sibenaller ZA, Allen BG, Wagner BA, Kalen AL, Doskey CM, Strother RK, Button AM, Mott SL, Smith B, Tsai S, Mezhir J, Goswami PC, Spitz DR, Buettner GR, Cullen JJ. (2015) Pharmacological ascorbate radiosensitizes pancreatic cancer. *Cancer Res.* **75(16)**:3314-3326. PMID: 26081808 <http://dx.doi.org/10.1158/0008-5472.CAN-14-1707> PMCID: PMC4537815
- <sup>11</sup> Buettner GR, Jurkiewicz BA. (1996) Catalytic metals, ascorbate, and free radicals: combinations to avoid. *Fenton Centennial Symposium Paper in Rad Research* **145**:532-541. PMID: 8619018 <http://www.jstor.org/stable/3579271> <http://dx.doi.org/10.2307/3579271>
- <sup>12</sup> Hempel SL, Buettner GR, Wessels DA, Galvan GM, O'Malley Y. (1996) Extracellular iron(II) can protect cells from hydrogen peroxide. *Arch Biochem Biophys.* **330**:401-408. PMID: 8660671 <http://dx.doi.org/doi:10.1006/abbi.1996.0268>
- <sup>13</sup> Mojić M, Bogdanović Pristov J, Maksimović-Ivanić D, Jones DR, Stanić M, Mijatović S, Spasojević I. (2014) Extracellular iron diminishes anticancer effects of vitamin C: an in vitro study. *Sci Rep.* **4**:5955. doi:10.1038/srep05955. PMID: 25092529 PMCID: PMC4121606
- <sup>14</sup> Buettner GR. (1986) Ascorbate autoxidation in the presence of iron and copper chelates. *Free Rad Res Commun.* **1**:349-353. <http://dx.doi.org/10.3109/10715768609051638> PMID: 2851502
- <sup>15</sup> Radi R, Beckman JS, Bush KM, Freeman BA. (1991) Peroxynitrite oxidation of sulfhydryls. The cytotoxic potential of superoxide and nitric oxide. *J Biol Chem.* **266(7)**:4244-2450. PMID: 1847917.
- <sup>16</sup> Aruoma O, Halliwell B, Hoey BM, Butler J. (1989) The antioxidant action of N-acetylcysteine: its reaction with hydrogen peroxide, hydroxyl radical, superoxide, and hypochlorous acid. *Free Radic Biol Med.* **6(6)**:593-597. PMID: 2546864
- <sup>17</sup> Giandomenico AR, Cerniglia GE, Biaglow JE, Stevens CW, Koch CJ. (1997) The importance of sodium pyruvate in assessing damage produced by hydrogen peroxide. *Free Radic Biol Med.* **23(3)**:426-434. PMID: 9214579
- <sup>18</sup> Desagher S, Glowinski J, Prémont J. (1997) Pyruvate protects neurons against hydrogen peroxide-induced toxicity. *J Neurosci.* **17(23)**:9060-9067. PMID: 9364052
- <sup>19</sup> Yun J, Mullarky E, Lu C, Bosch KN, Kavalier A, Rivera K, Roper J, Chio II, Giannopoulou EG, Rago C, Muley A, Asara JM, Paik J, Elemento O, Chen Z, Pappin DJ, Dow LE, Papadopoulos N, Gross SS, Cantley LC. (2015) Vitamin C selectively kills KRAS and BRAF mutant colorectal cancer cells by targeting GAPDH. *Science.* **350(6266)**:1391-1396. <http://dx.doi.org/10.1126/science.aaa5004> PMID: 26541605
- <sup>20</sup> Anonymous. (2016) The power of disagreement. *Nature Methods* **13(3)**:185. <http://dx.doi.org/10.1038/nmeth.3798>
- <sup>21</sup> Buettner GR. (2015) Moving free radical and redox biology ahead in the next decade(s). *Free Radic Biol Med.* **78**:236-238. PMID: 25450329 <http://dx.doi.org/10.1016/j.freeradbiomed.2014.10.578> PMCID: PMC4331124
- <sup>22</sup> Doskey CM, van 't Erve TJ, Wagner BA, Buettner GR. (2015) Moles of a substance per cell is a highly informative dosing metric in cell culture. *PLoS ONE* **10(7)**: e0132572. PMID: 26172833 <http://dx.doi.org/doi:10.1371/journal.pone.0132572> PMCID: PMC4501792
